# Supplementary material for: Salmonella Gallinarum in Small-Scale Commercial Layer Flocks: Occurrence, Molecular Diversity and Antibiogram
Source: MDPI journal article supplement (doi:10.3390/vetsci8050071), 2021-04-23
Supplement: s1 [file s1]

**Supplementary Table S1:** Description diversity of the surveyed farms, with type of sample collection and farm-wise variation in the occurrence of *S. Gallinarum* farm level positivity status (N=12)

| Division<br>(region)     | District    | Flock<br>ID | Flock<br>Size | Breed               | Age of<br>production<br>fall (wks) | No. of samples<br>collected |           |            | Total      | PCR positives isolates<br>(Specific for <i>invA</i> and<br><i>spvC</i> genes) |           |           | Total      | Farm level<br>occurrence<br>(%) |
|--------------------------|-------------|-------------|---------------|---------------------|------------------------------------|-----------------------------|-----------|------------|------------|-------------------------------------------------------------------------------|-----------|-----------|------------|---------------------------------|
|                          |             |             |               |                     |                                    | CS                          | VO        | D          |            | CS                                                                            | VO        | D         |            |                                 |
| Dhaka<br>(central)       | Gazipur     | D3          | ≤1500         | Hy-Line Brown       | 39                                 | 50                          | 8         | 15         | 73         | 15                                                                            | 2         | 3         | 20         | 27.39                           |
|                          | Gazipur     | D5          | ≤2500         | Shaver Brown<br>579 | 45                                 | 60                          | 12        | 15         | 87         | 13                                                                            | 5         | 3         | 21         | 24.13                           |
|                          | Tangail     | D6          | ≤1100         | Shaver Brown<br>579 | 47                                 | 45                          | 0         | 15         | 60         | 11                                                                            | 0         | 5         | 16         | 26.67                           |
| Mymensingh<br>(Northern) | Mymensingh  | N8          | ≤1300         | Hy-Line Brown       | 51                                 | 30                          | 0         | 15         | 45         | 0                                                                             | 0         | 0         | 0          | -                               |
|                          | Jalalpur    | D9          | ≤1100         | ISA Brown           | 44                                 | 35                          | 0         | 15         | 50         | 0                                                                             | 0         | 0         | 0          | -                               |
|                          | Netrakona   | D20         | ≤1400         | Hisex Brown         | 38                                 | 50                          | 7         | 15         | 72         | 25                                                                            | 3         | 13        | 41         | 56.94                           |
| Rangpur<br>(North west)  | Dinajpur    | L15         | ≤1500         | Hy-line Brown       | 42                                 | 45                          | 0         | 15         | 60         | 13                                                                            | 0         | 5         | 18         | 30.00                           |
|                          | Bogura      | L20         | ≤2000         | ISA Brown           | 48                                 | 55                          | 8         | 15         | 78         | 13                                                                            | 3         | 3         | 19         | 24.36                           |
| Sylhet<br>(North east)   | Habiganj    | P2          | ≤1000         | Shaver Brown<br>579 | 43                                 | 35                          | 0         | 15         | 50         | 0                                                                             | 0         | 0         | 0          | -                               |
|                          | Maulvibazar | K9          | ≤1500         | ISA Brown           | 39                                 | 45                          | 7         | 15         | 67         | 20                                                                            | 4         | 8         | 32         | 47.76                           |
| Chottogram<br>(Southern) | Chottogram  | M1          | ≤2000         | Hisex Brown         | 51                                 | 50                          | 0         | 15         | 65         | 11                                                                            | 0         | 2         | 13         | 20.00                           |
|                          | Feni        | S8          | ≤1000         | Hy-Line Brown       | 38                                 | 35                          | 8         | 15         | 58         | 8                                                                             | 4         | 5         | 17         | 29.31                           |
| <b>Overall</b>           |             |             |               |                     |                                    | <b>535</b>                  | <b>50</b> | <b>180</b> | <b>765</b> | <b>129</b>                                                                    | <b>21</b> | <b>47</b> | <b>197</b> | <b>25.75</b>                    |

Note: CS= Cloacal Swab, VO= Visceral Organs, D=Droppings
