# Supplementary material for: Salmonella Gallinarum in Small-Scale Commercial Layer Flocks: Occurrence, Molecular Diversity and Antibiogram
Source: MDPI journal article supplement (doi:10.3390/vetsci8050071), 2021-04-23
Supplement: s1 [file s1]

**Supplementary Table S2: Sample collection checklist**

**Name of the project:** *Salmonella* Gallinarum in Small-scale Commercial Layer Flocks: Occurrence, Molecular Diversity and Antibigram

**Sample collection checklist code # .....**

**Flock Details:**

Layer Flock code: .....

Flock size : .....

Age (week's) : .....

**Geo-spatial location:**

Northing..... Easting.....

Location of layer farm:

Village:....., Sub-district (Upazila): ..... , District: .....

**Breed details:**

Source of Layer DOC (Breed): .....

Source of Feed (Self made / private feed mill company): .....

**Sampling time:**

Expected time of drop of egg production: .....

Sampling also done during any abnormality observed in egg production: .....

Any medicine/ chemicals were given to the flock while sampling?: Y / N

If yes: Please mention the name of medicine with dose: .....

**Sample Code #**

| Sample type   | Sample ID | Remarks |
|---------------|-----------|---------|
| Cloacal swab  |           |         |
| Droppings     |           |         |
| Whole carcass |           |         |

**Signature .....**  
**(Research assistant/fellow)**

**Signature .....**  
**(Research Supervisor)**
